# Supplementary material
Source: PubMed Central journal article supplement (PMC3993535)
Supplement: JVI.03060-13_zjv999098805so1.pdf [file JVI.03060-13_zjv999098805so1.pdf]

# Figure S1

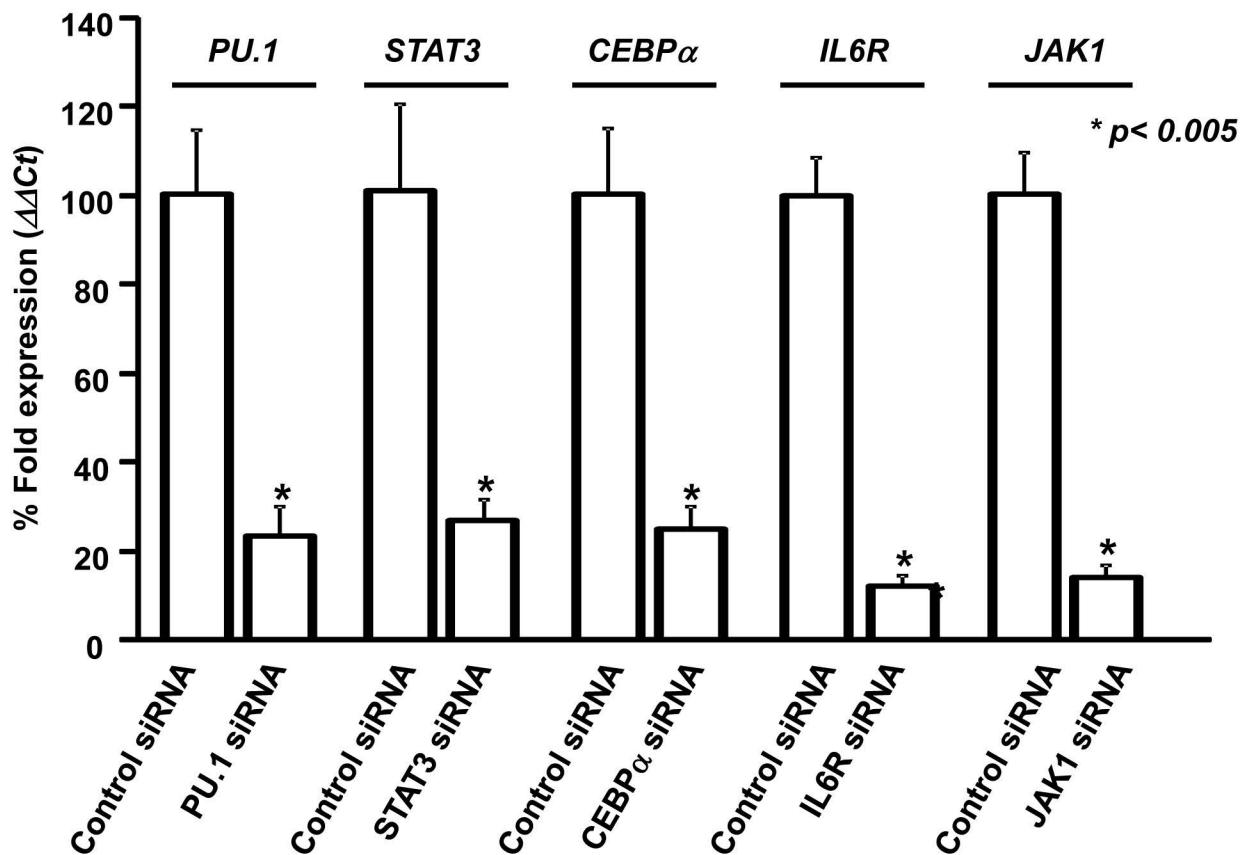

## Supplementary figure S1: Quantification of siRNA mediated knockdown of *PU.1*, *STAT3*, *CEBP $\alpha$* , *IL6R* and *JAK1* in human hepatocytes

Hepatocytes were transfected with either non-specific (control) siRNA or siRNAs specific for *PU.1*, *STAT3*, *CEBP $\alpha$* , *IL6R* and *JAK1*. RNA was isolated and individual gene expression levels were determined by qPCR. The  $\Delta\Delta Ct$  values were calculated by normalizing the threshold (CT) values with GAPDH and individual gene expression levels in controls. The '\*' represents p value < 0.005 calculated by two-tailed t test. Error bars represent Standard Deviations (SD) obtained from three independent replicates.

# Figure S2

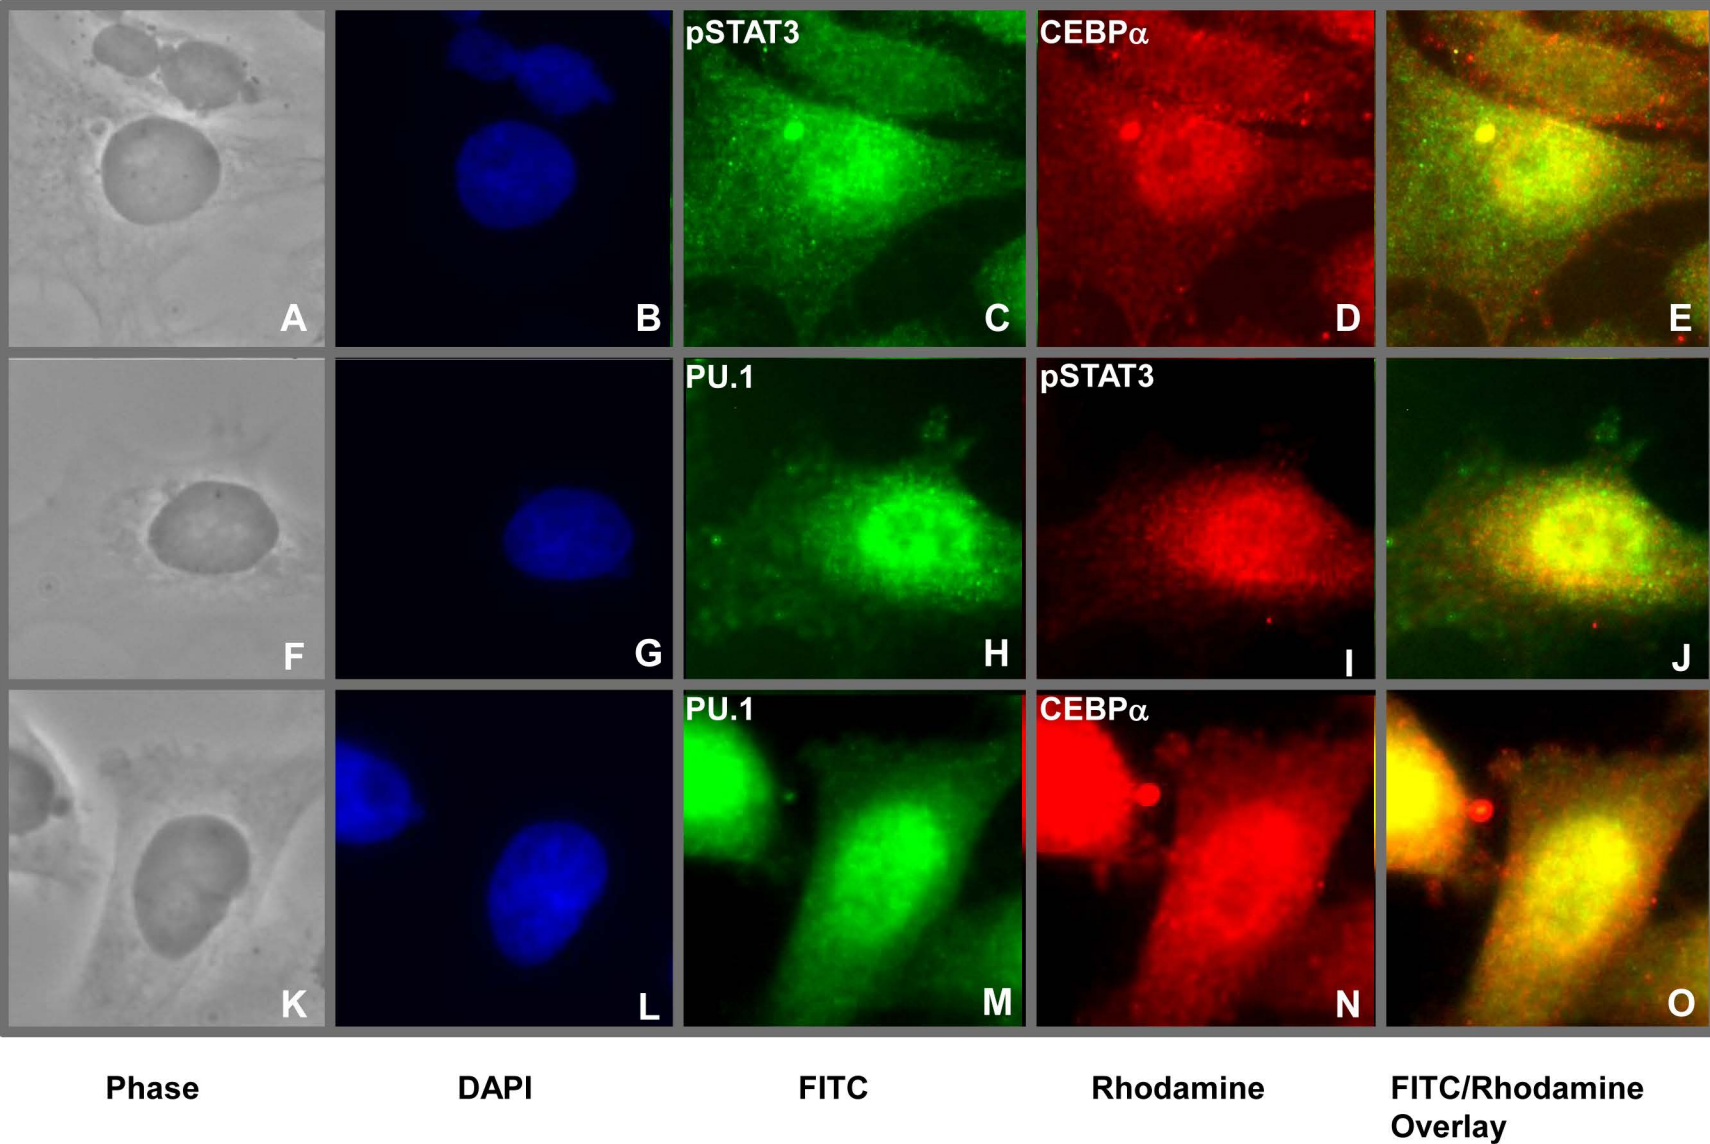

**Figure S2. Nuclear co-localization of CEBP $\alpha$ , PU.1 and STAT3.** HEPG2 cells were treated with IL6 and co-immunostained with anti-STAT3/anti-CEBP $\alpha$  (upper panels), anti-PU.1/anti-STAT3 (middle panels) or anti PU.1/anti-CEBP $\alpha$  (lower panels). A, F, K represent phase images; B, G, L show nuclear staining by DAPI; C, H, M represent FITC (green); D, I, N represent Rhodamine (red); E, J, O represent overlay between green and red (yellow).

**Figure S3**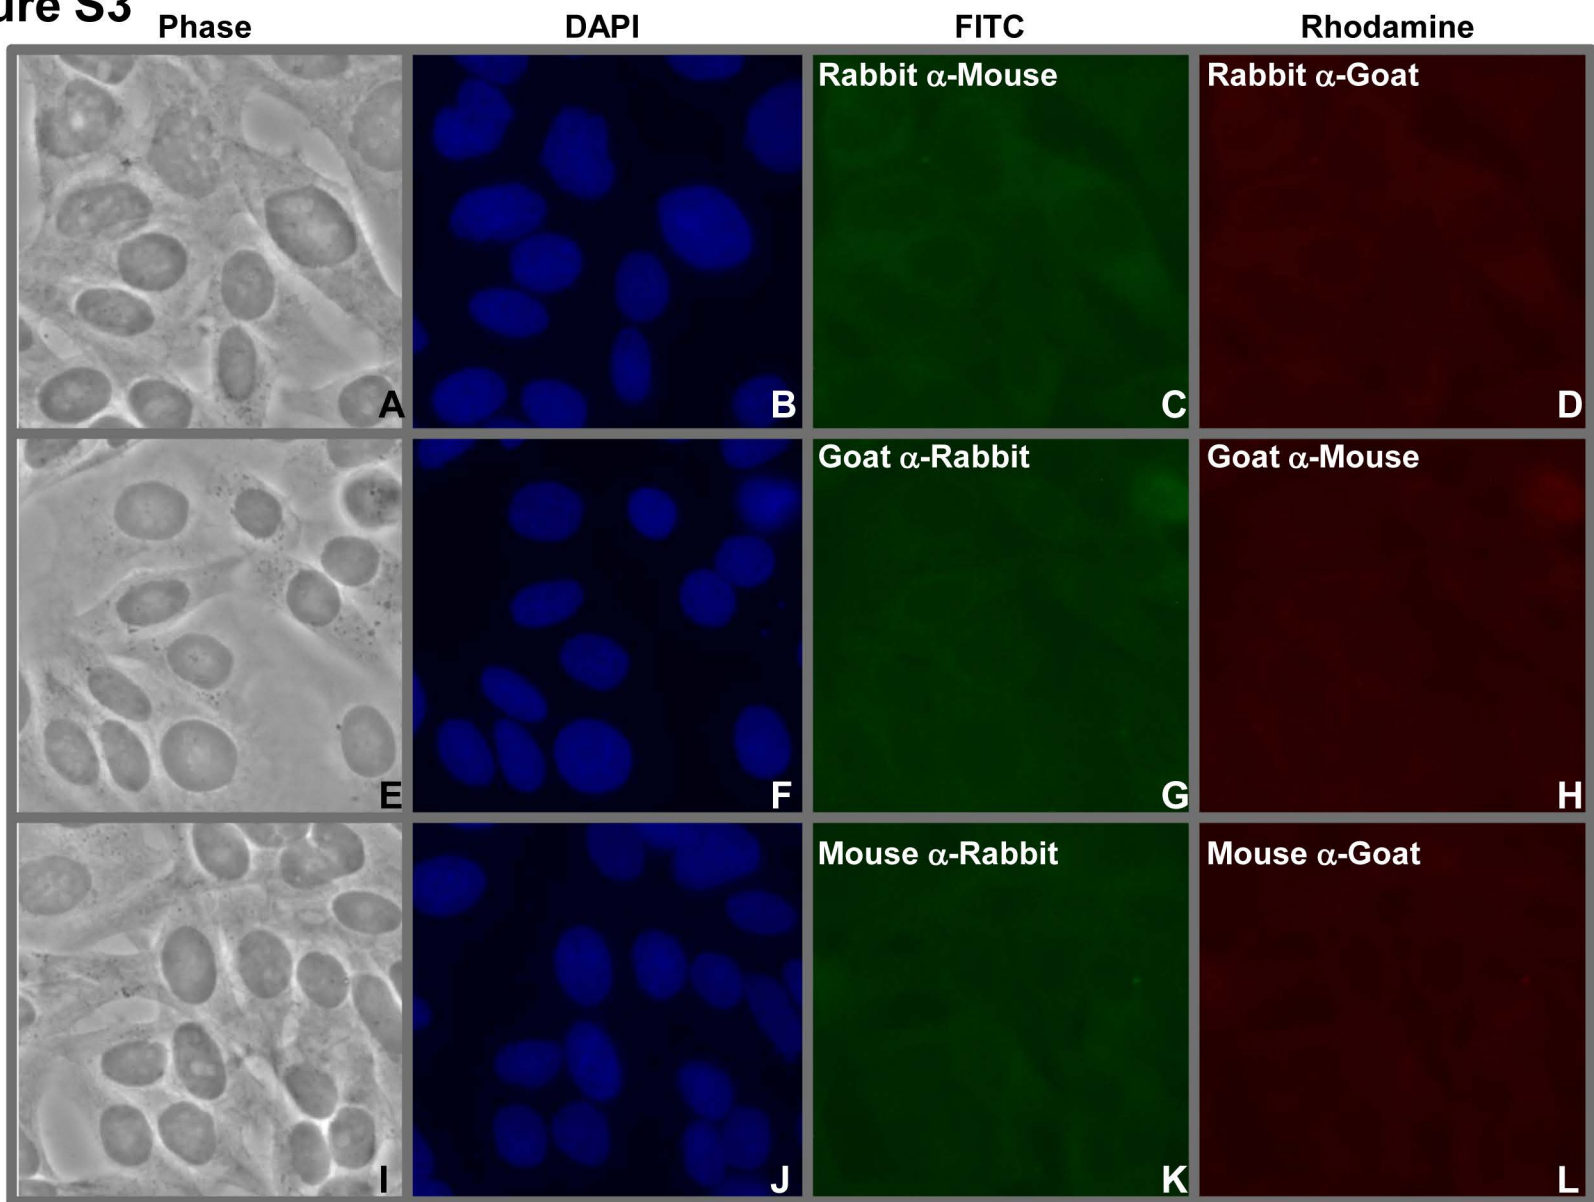

**Figure S3. Negative control immunostaining:** HEPG2 cells were co-immunostained with fluorescence conjugated secondary antibodies (C-L). A, E, I represent phase images; B,F,J show nuclear staining by DAPI; C,G,K represent FITC (green); D,H,L represent Rhodamine (red).

**Table S1: Patient Demographics**

| Demographic                           |                  | HCV       | AH        | NASH      | Control   |
|---------------------------------------|------------------|-----------|-----------|-----------|-----------|
| Number (n)                            |                  | 10        | 10        | 10        | 10        |
| Gender M:F                            |                  | 3:7       | 4:6       | 5:5       | 6:4       |
| Age (mean, SD)                        |                  | 53 ± 6    | 46 ± 8    | 49 ± 10   | 40 ± 7    |
| Recipient Race (n)                    | Caucasian        | 60%       | 50%       | 70%       | 40%       |
|                                       | African American | 40%       | 50%       | 30%       | 60%       |
| Bilirubin (mg/dL)                     |                  | 2.1 ± 0.5 | 1.8 ± 0.5 | 1.4 ± 0.8 | 1.1 ± 0.4 |
| ALT (IU/ml)                           |                  | 61 ± 24   | 136 ± 54  | 71 ± 41   | 25 ± 9    |
| AST (IU/ml)                           |                  | 105 ± 42  | 96 ± 34   | 82 ± 25   | 27 ± 8    |
| ALT (IU/ml)                           |                  | 61 ± 24   | 136 ± 54  | 71 ± 41   | 25 ± 9    |
| HCV Viral load (X10 <sup>6</sup> /mL) |                  | 2.1 ± 0.5 | n/a       | n/a       | n/a       |
| HCV genotype                          | 1                | 6         | n/a       | n/a       | n/a       |
|                                       | %                | 19.3%     | n/a       | n/a       | n/a       |
|                                       | 1a               | 3         | n/a       | n/a       | n/a       |
|                                       | %                | 30.1.3%   | n/a       | n/a       | n/a       |
|                                       | 1b               | 1         | n/a       | n/a       | n/a       |
|                                       | %                | 21.5%     | n/a       | n/a       | n/a       |

SD: Standard Deviation, HCV: Hepatitis C Virus, AH: Alcoholic Hepatitis, NASH: Non-Alcoholic Steatohepatitis, M: Male, F: Female, AST: Aspartate Amino Transferase, ALT: Alanine Amino Transferase
